# Supplementary figures and images for: Cerebrospinal Fluid Biomarkers for the Diagnosis of Prodromal Alzheimer's Disease in Amnestic Mild Cognitive Impairment
Source: PubMed Central journal article supplement — Dement Geriatr Cogn Dis Extra. 2019 Mar 12;9(1):100–13. doi: 10.1159/000496920 (PMC6465729; doi:10.1159/000496920), 2019-03-12

# Supplementary Data: Figure 1

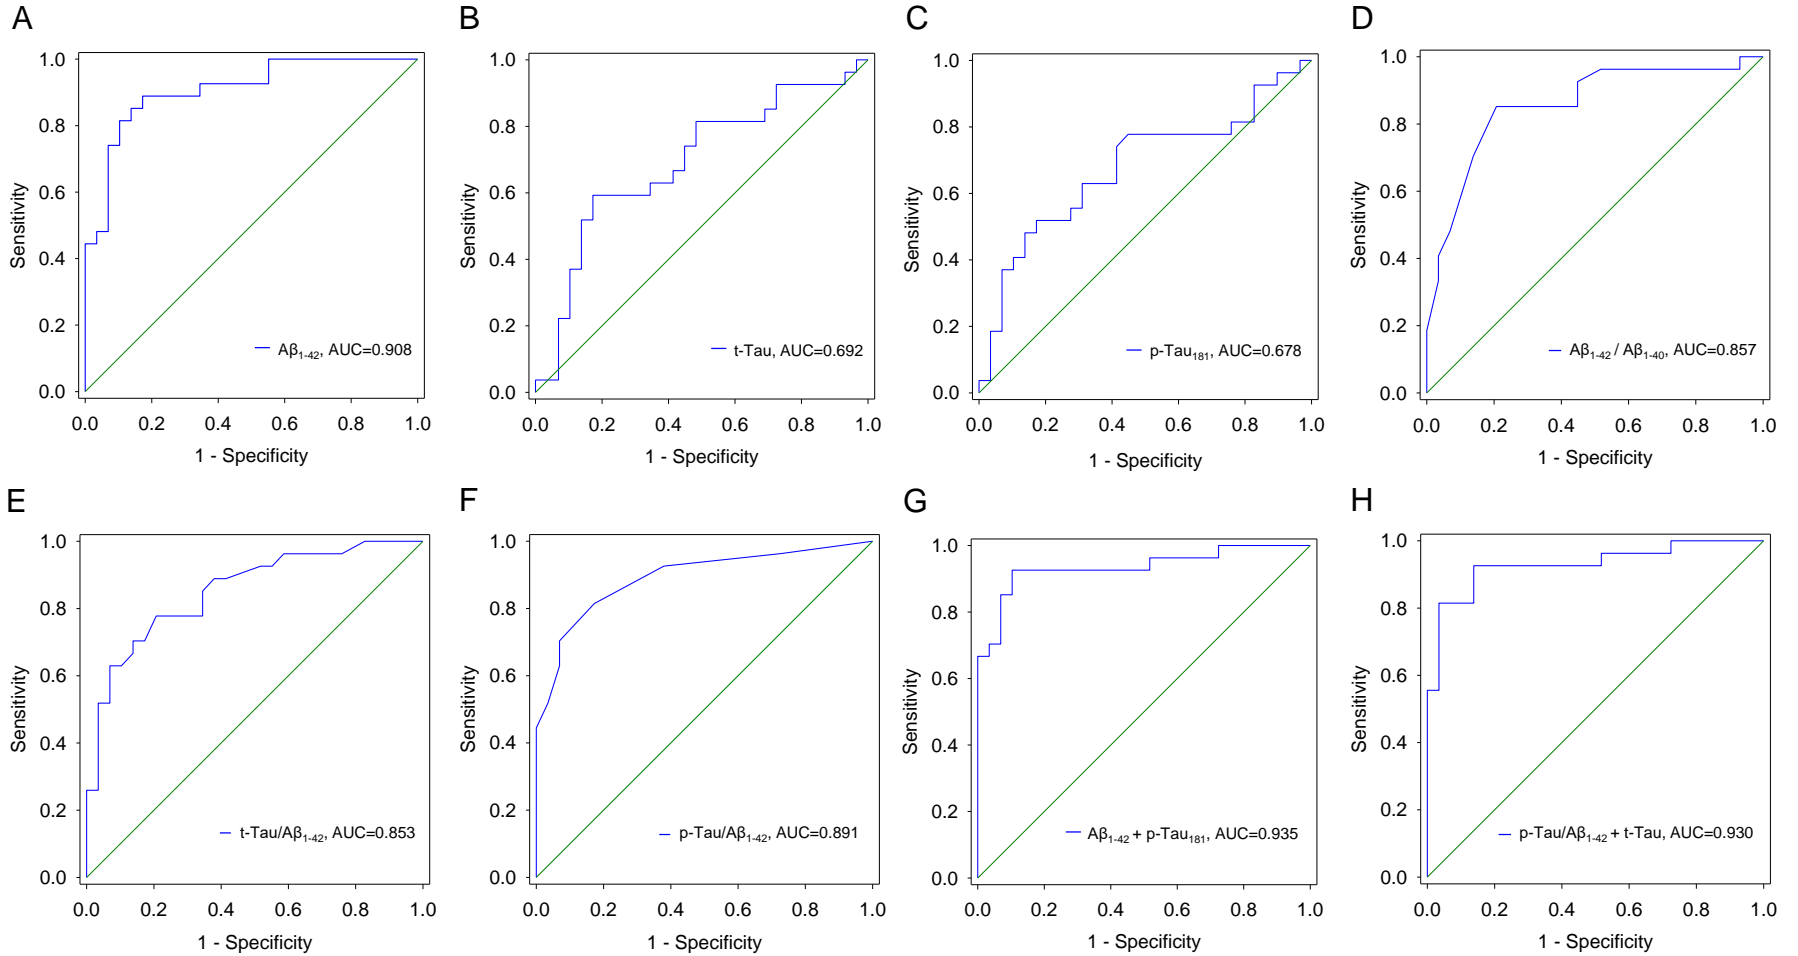

Supplement: dee-0009-0100-s02.pdf [file dee-0009-0100-s02.pdf]
